# Supplementary material
Source: Springer Nature journal article supplement (https://www.springermedizin.de/resource/supplementary/12875_2014_1089_MOESM2_ESM.docx/9435806)
Supplement: MOESM2 [file 9435806]

| **Table 1.** The proportion of patients with chronic diseases distributed over contact types1 | | | | | | | | | | | | |
| --- | --- | --- | --- | --- | --- | --- | --- | --- | --- | --- | --- | --- |
|  | **Telephone consultation** | | **Telephone referral** | | **Clinical consultation** | | | **Home visit** | | | **All** | |
| **The unique patients are diagnosed to:** | **n** | **(%)** | **n** | **(%)** | **N** | | **(%)** | **N** | **(%)** | | **n** | **(%)** |
| 0: None of the five diagnoses | 2,076 | (70.3) | 1,322 | (65.0) | 3,049 | (79,1) | | 2,571 | | (50.5) | 9,018 | (64.9) |
| 1: Only one of the five diagnoses | 694 | (23.5) | 549 | (27.0) | 674 | (17.5) | | 674 | | (33.5) | 3,624 | (25.9) |
| 2: Two or more of the five diagnoses | 183 | (6.2) | 162 | (8.0) | 130 | (3.4) | | 813 | | (16.0) | 1,288 | (9.2) |
| Total | 2,953 | (100.0) | 1,975 | (100.0) | 3,853 | (100.0) | | 5,152 | | (100.0) | 13,930 | (100.0) |
| 1The number of identified patients for each contact type is calculated without consideration of patients with more than one of the chronic diseases; consequently, the total will sum up to more than 13,930 unique patients with chronic diseases. | | | | | | | | | | | | |
